# Supplementary material for: Here Puppy, Chew on This: Short-Term Provision of Toys Does Not Improve Welfare in Companion Dogs
Source: MDPI journal article supplement (doi:10.3390/ani13213340), 2023-10-27
Supplement: s1 [file s1]

**Supplementary Materials for Here puppy, chew on this: Short-term provision of toys does not improve welfare in companion dogs**

Kelly Chan, Carol Arellano, Alexandra Horowitz

**Table S1. Subject demographic data**

| Dog name | Age (yrs) | Sex | Breed             | Reported Favorite Toy | Group, Level from 1-3 (if applicable) |
|----------|-----------|-----|-------------------|-----------------------|---------------------------------------|
| Arlo     | 5.33      | M   | Mixed             | Plush toy             | E, 2                                  |
| Bella    | 2.42      | F   | Mixed             | Ball                  | C                                     |
| Beto     | 1.92      | M   | Mixed             | Food stuffed toy      | C                                     |
| Cash     | 4         | M   | Mixed             | Squeaky toy           | E, 1                                  |
| Chaco    | 4.33      | M   | Australian Cattle | Ball                  | E, 1                                  |
| Clover   | 0.5       | F   | Mixed             | Plush toy             | E, 2                                  |
| Cody     | 1.92      | M   | Mixed             | Food stuffed toy      | E, 3                                  |
| Dahlia   | 2.58      | F   | Mixed             | Ball                  | E, 3                                  |
| Dorado   | 1.92      | M   | Mixed             | Plush toy             | E, 1                                  |
| Enzo B   | 4         | M   | Mixed             | Plush toy             | E, 3                                  |
| Enzo K   | 1.92      | M   | Wheaten Terrier   | Plush toy             | C                                     |
| Flossie  | 2.25      | F   | Mixed             | Plush toy             | C                                     |
| Freja    | 7.08      | F   | Mixed             | Plush toy             | C                                     |
| Gatsby   | 3.67      | M   | Havanese          | Plush toy             | C                                     |
| Ginger   | 8.75      | F   | Mixed             | Plush toy             | E, 2                                  |
| Gypsy    | 8.33      | F   | Mixed             | Puzzle toy            | E, 1                                  |
| Jack     | 8.17      | M   | Mixed             | Squeaky toy           | E, 1                                  |
| Jameson  | 9.5       | M   | Mixed             | Plush toy             | E, 2                                  |
| Jasper   | 0.5       | M   | Affenpinscher     | Socks                 | C                                     |
| Joey     | 1.67      | M   | Mixed             | Rope toy              | E, 3                                  |
| Koa      | 4.25      | M   | Mixed             | Plush toy             | E, 3                                  |
| Kona     | 2.75      | F   | Mixed             | Rope toy              | C                                     |
| Leo      | 5.25      | M   | Mixed             | Squeaky toy           | E, 3                                  |
| Lola     | 6.92      | F   | Mixed             | Plush toy             | E, 2                                  |
| Lolo     | 11.92     | M   | Shetland Sheepdog | Puzzle toy            | E, 2                                  |
| Lou      | 8.58      | F   | Border Collie     | Squeaky toy           | C                                     |
| Lulu     | 4.67      | F   | Fox Terrier       | Plush toy             | E, 2                                  |
| Molly    | 7.17      | F   | Mixed             | Sandbox               | C                                     |
| Olive    | 2.17      | F   | Mixed             | Puzzle toy            | E, 3                                  |

|              |      |   |                                  |             |      |
|--------------|------|---|----------------------------------|-------------|------|
| Oliver       | 5.5  | M | Mixed                            | Ball        | E, 2 |
| Penny        | 9.5  | F | Mixed                            | Plush toy   | C    |
| Percy        | 1.58 | M | Mixed                            | Squeaky toy | E, 1 |
| Perry        | 4.58 | M | Cavalier King<br>Charles Spaniel | Ball        | E, 1 |
| Pixie        | 1.25 | F | Mixed                            | Plush toy   | C    |
| Pogo         | 3.83 | M | Mixed                            | Plush toy   | E, 1 |
| Ponyboy      | 8.75 | M | Mixed                            | (none)      | E, 2 |
| Poppy        | 0.92 | F | Mixed                            | Ball        | E, 2 |
| Posie        | 4.25 | F | Shih tzu                         | Puzzle toy  | E, 3 |
| Sage-Galileo | 2.08 | F | Mixed                            | Puzzle toy  | E, 3 |
| Shadow       | 2.25 | M | Newfoundland                     | Plush toy   | C    |
| Shea         | 8.58 | M | Mixed                            | Squeaky toy | E, 1 |
| Sprout       | 6.17 | M | Brussels Griffon                 | Ball        | E, 1 |
| Suki         | 2.25 | F | Pug                              | Squeaky toy | C    |
| Willa        | 7.67 | F | English Springer<br>Spaniel      | Plush toy   | E, 1 |
| Ziggy        | 3.83 | M | Mixed                            | Plush toy   | C    |
| ZiShunka     | 2.42 | F | Mixed                            | Plush toy   | E, 1 |
| Zora         | 2    | F | Mixed                            | Ball        | E, 3 |

---

*Note: "E" = Experimental group; "C" = Control group*
